# Supplementary material for: The plant Polycomb repressive complex 1 (PRC1) existed in the ancestor of seed plants and has a complex duplication history
Source: PubMed Central journal article supplement (PMC4397884; doi:10.1186/s12862-015-0319-z), 2015-03-13
Supplement: 12862_2015_319_MOESM6_ESM.pdf [file 12862_2015_319_MOESM6_ESM.pdf]

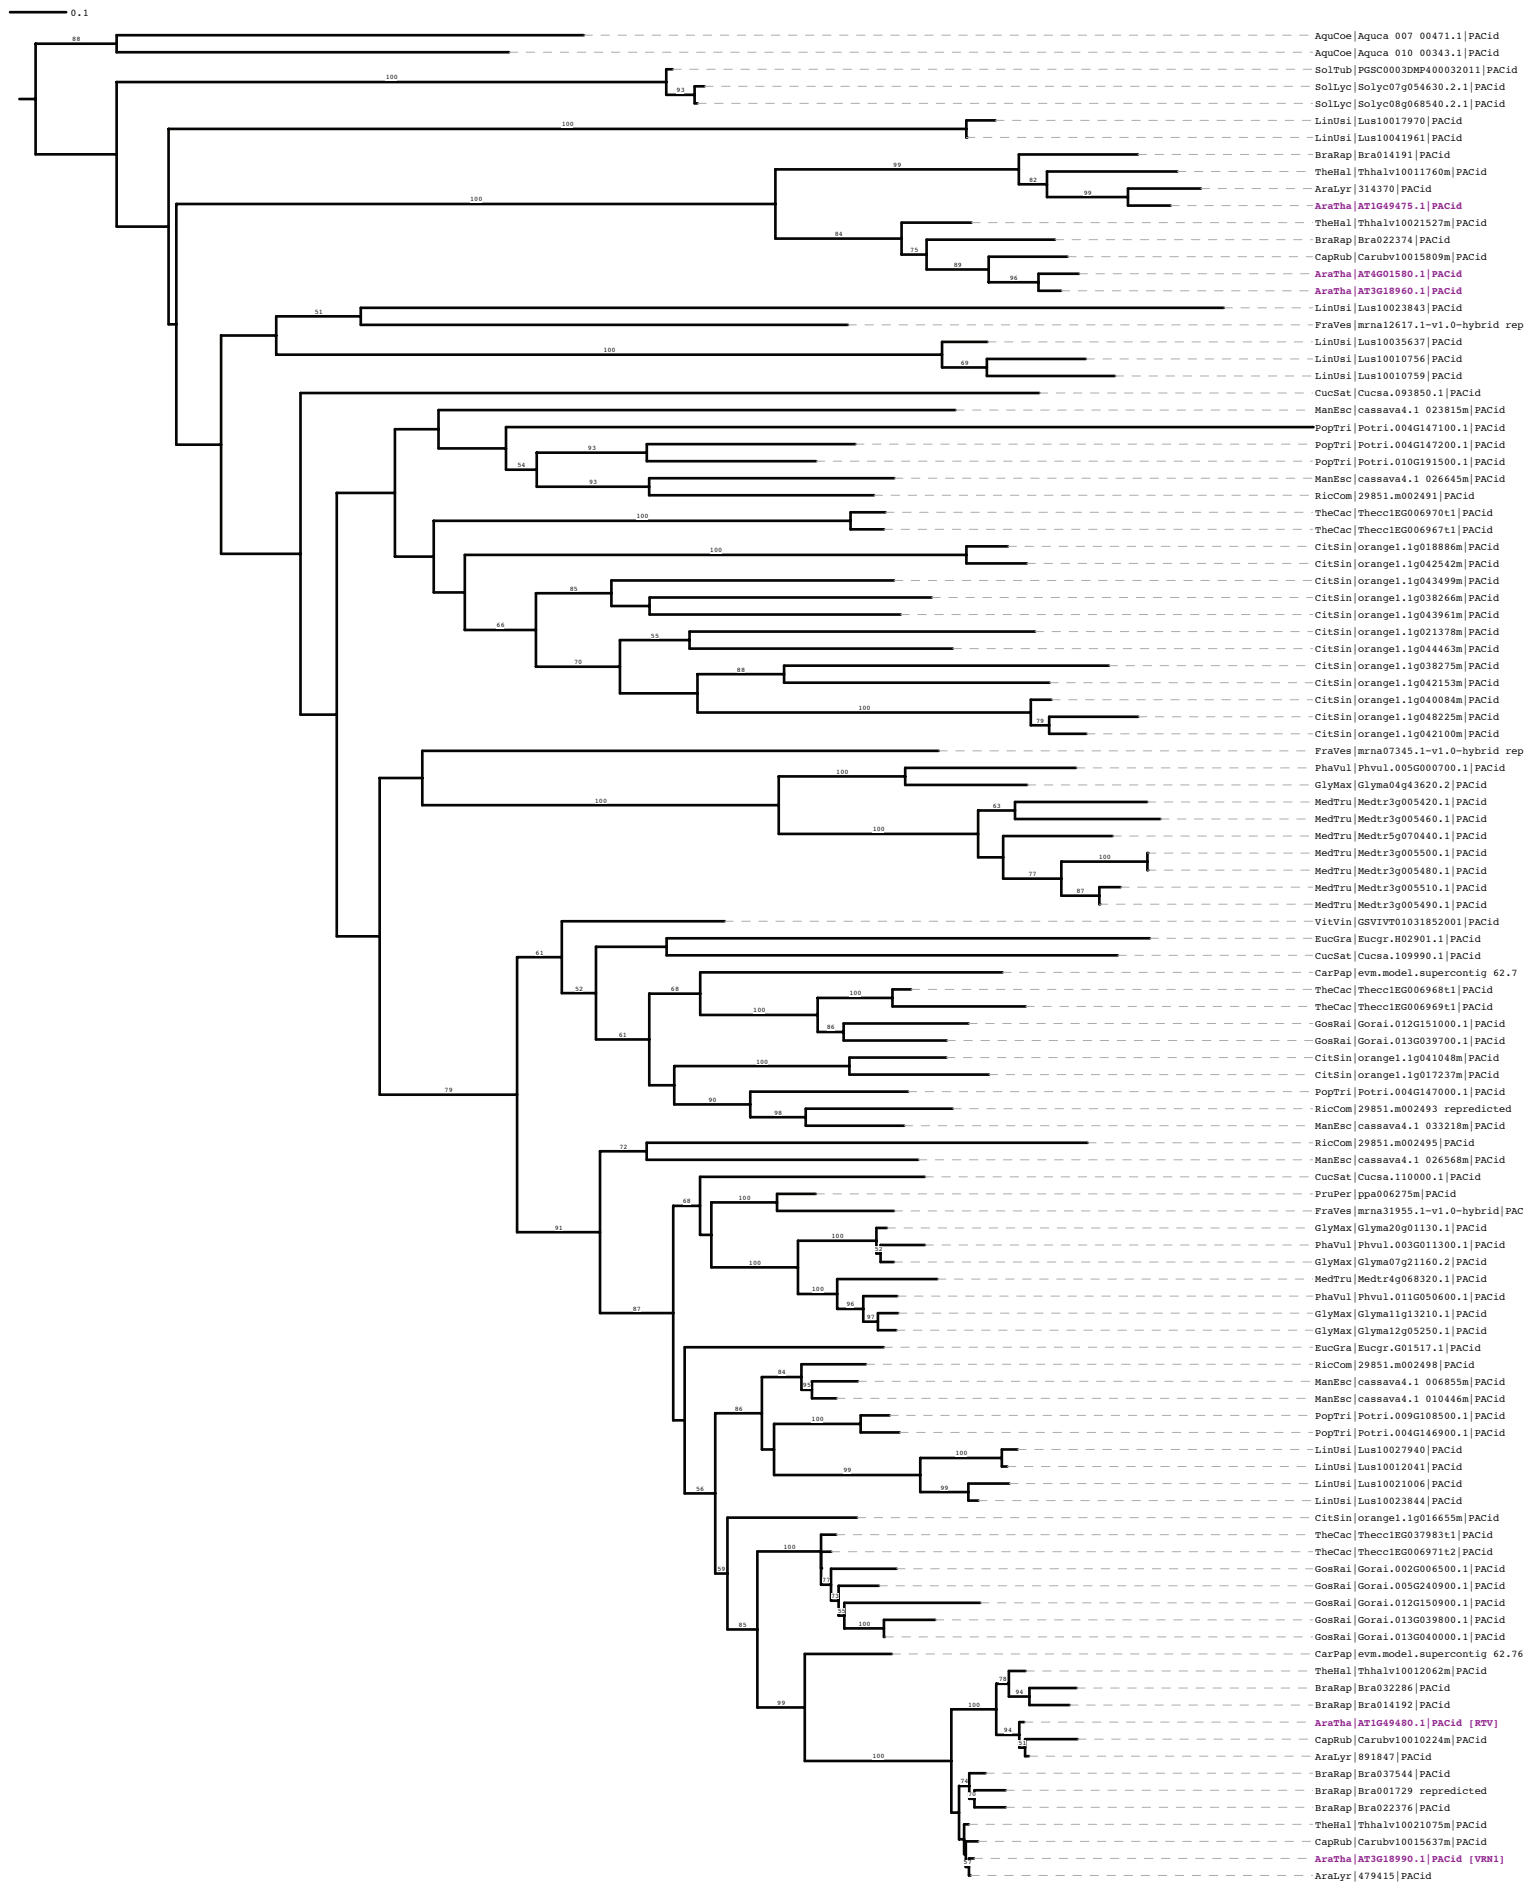

**Additional file 6.** VRN1 gene tree. Only bootstrap values higher than 50 are shown. *A. thaliana* genes are highlighted in purple.
